# Supplementary material for: Systematic review and meta-analysis of surgical drain management after the diagnosis of postoperative pancreatic fistula after pancreaticoduodenectomy: draining-tract-targeted works better than standard management
Source: Springer Nature journal article supplement (doi:10.1007/s00423-020-02005-8), 2020-10-26

### CR-POPF: % POMR (group A1-B1)

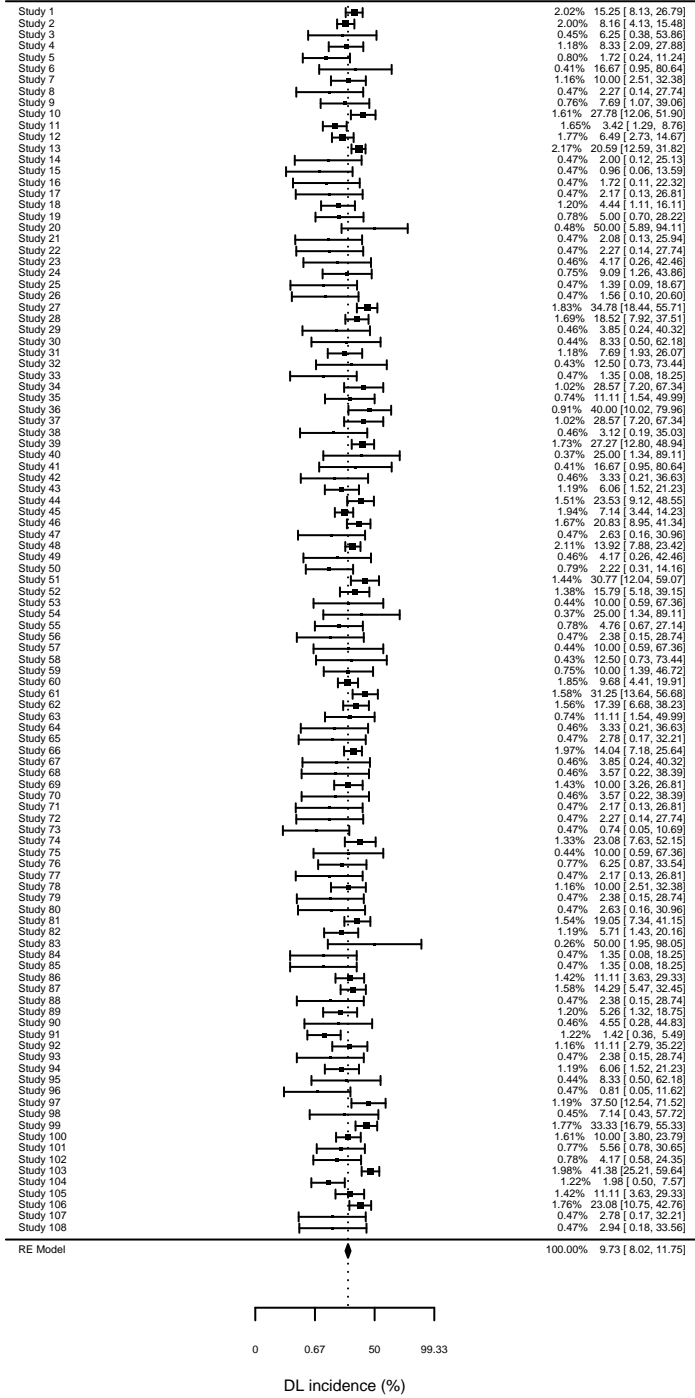

### CR-POPF: % POMR (group A2-B2)

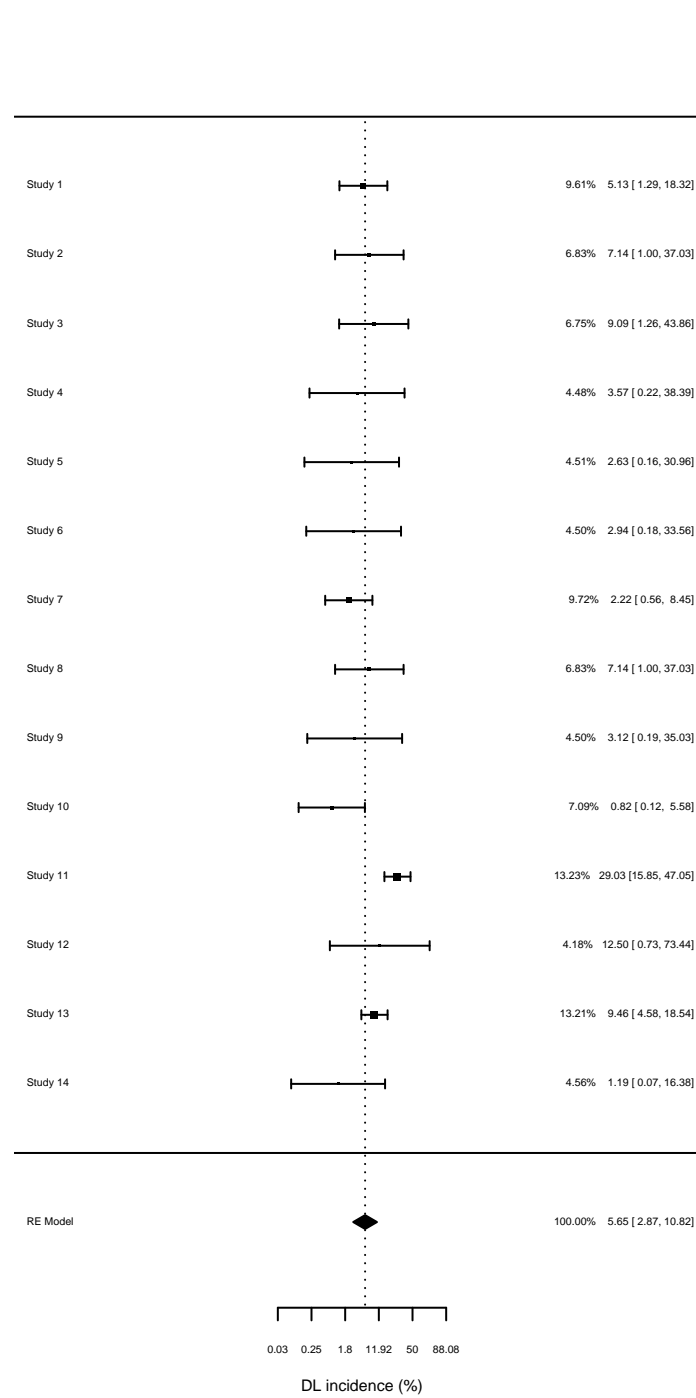

### CR-POPF: % POMR (group C)

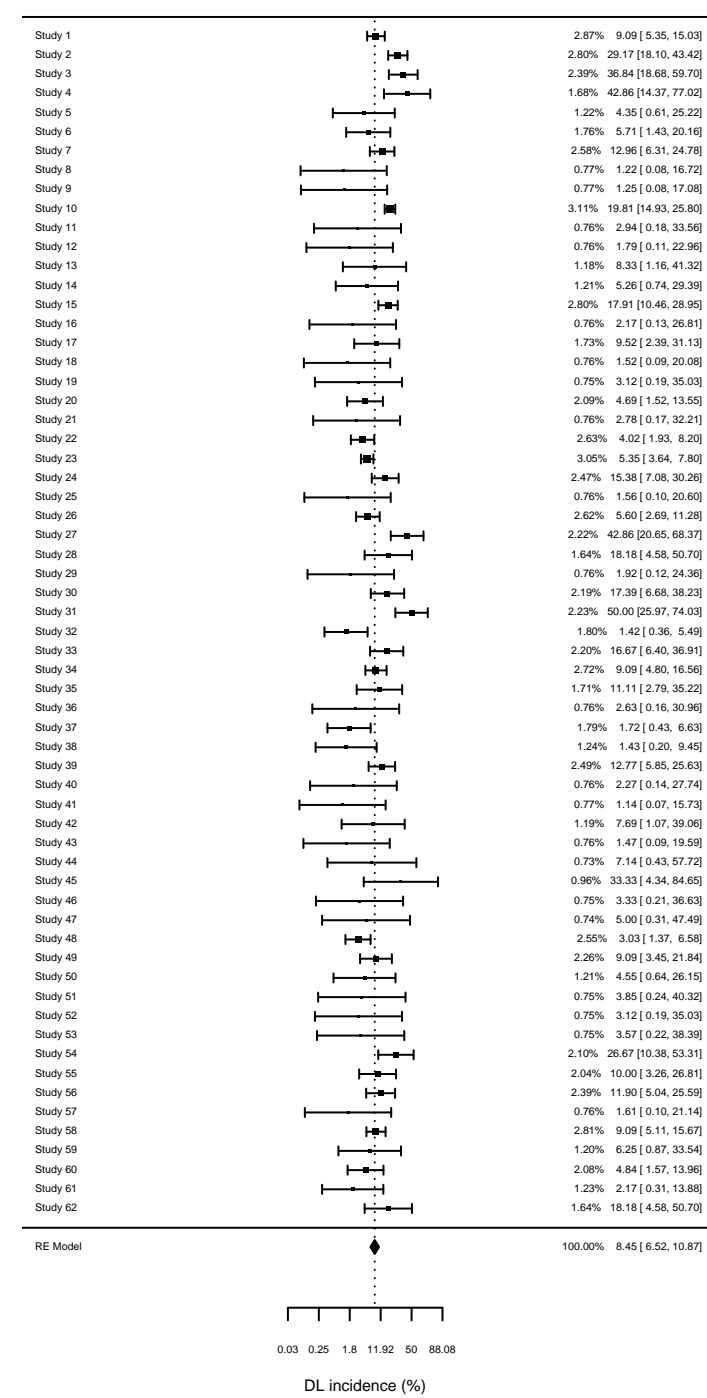

Supplement: MOESM5 [file 18521592]
