# Supplementary material for: Systematic review and meta-analysis of surgical drain management after the diagnosis of postoperative pancreatic fistula after pancreaticoduodenectomy: draining-tract-targeted works better than standard management
Source: Springer Nature journal article supplement (doi:10.1007/s00423-020-02005-8), 2020-10-26
Supplement: MOESM8 [file 18521592]

# Completion pancreatectomy (group A1)

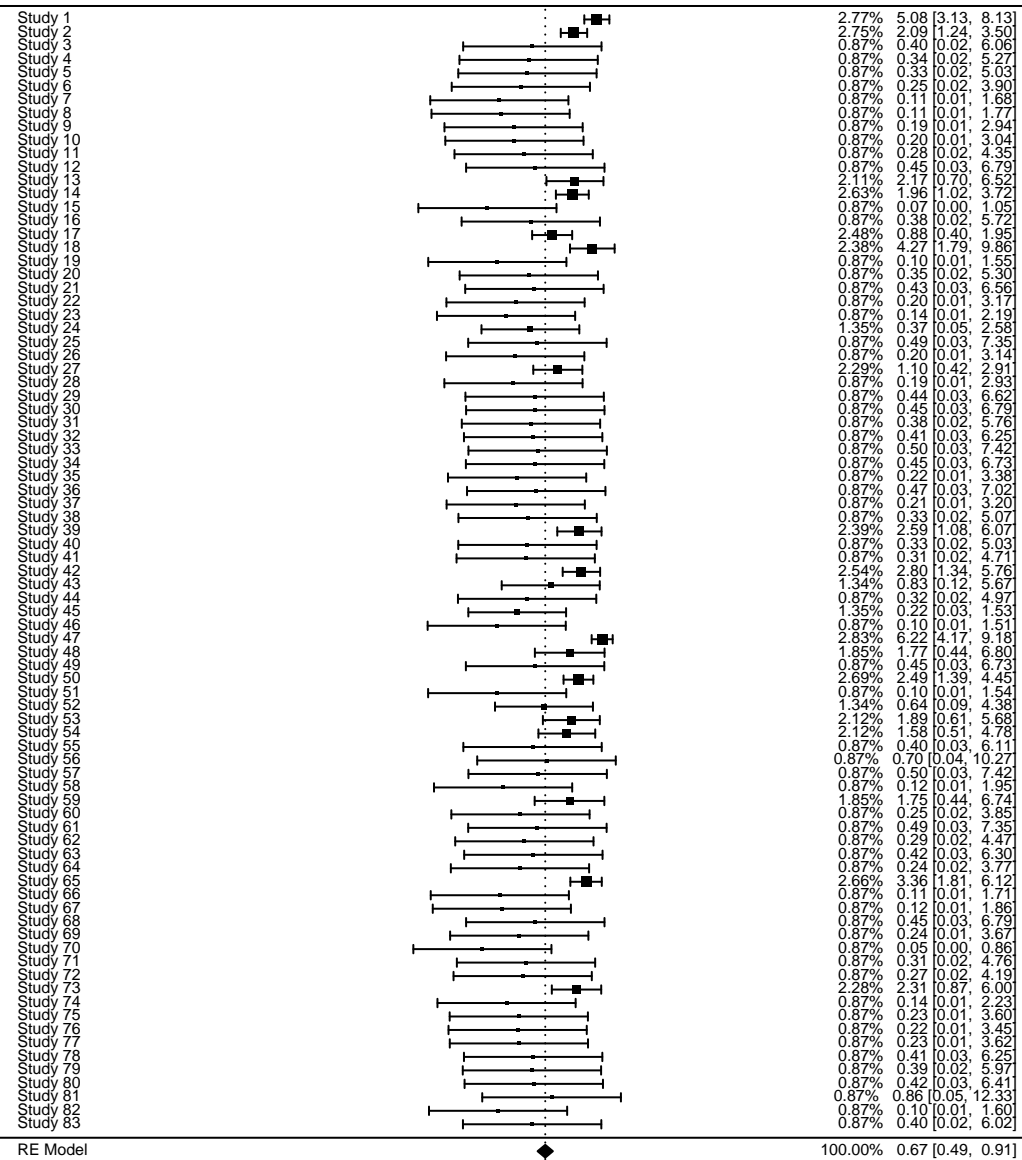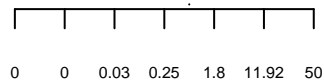

DL incidence (%)

# Completion pancreatectomy (group A2)

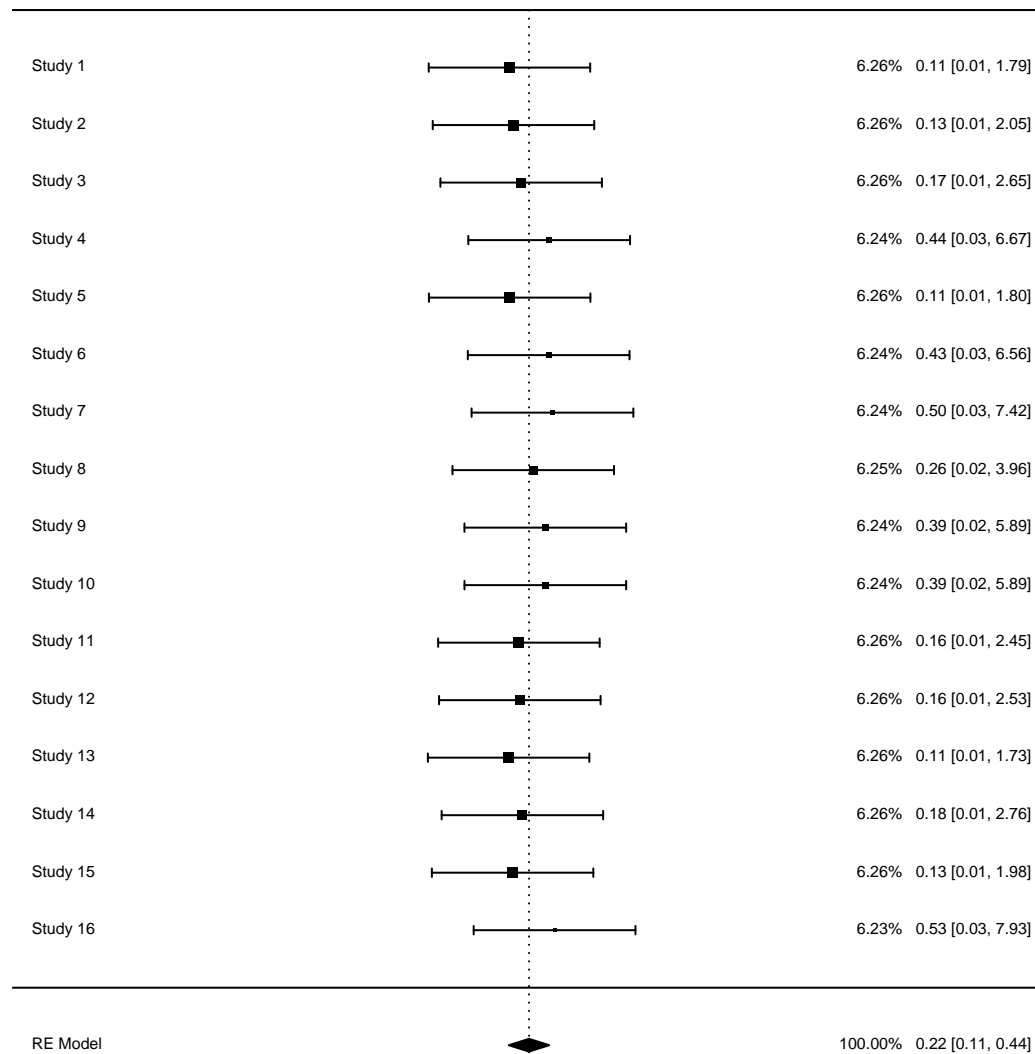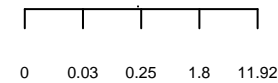

DL incidence (%)
